# Supplementary material for: A Microplate-Based Approach to Map Interactions between TDP-43 and α-Synuclein
Source: MDPI journal article supplement (doi:10.3390/jcm11030573), 2022-01-24
Supplement: s1 [file s1]

## Supplementary Materials

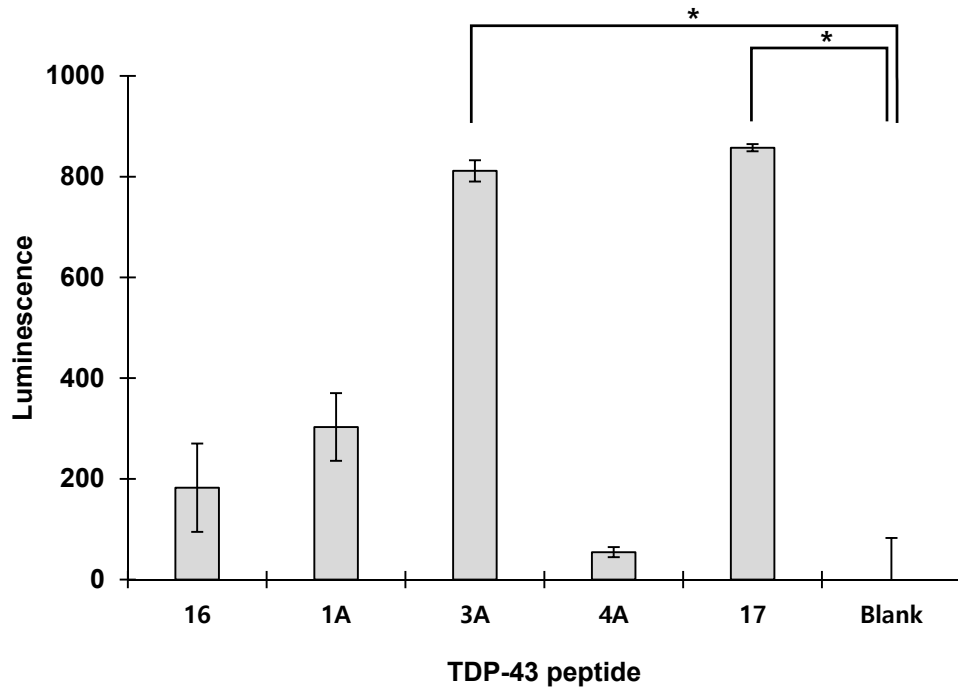

**Figure S1.** Normalized bound  $\alpha$ -synuclein to overlapping peptides of TDP-43 (overlapping peptides are indicated with A). Data are shown as mean  $\pm$  SD of duplicate measurement. Significant luminescence was observed for bound  $\alpha$ -synuclein at peptides 1A and 3A when compared to the background ( $p < 0.05$ ).

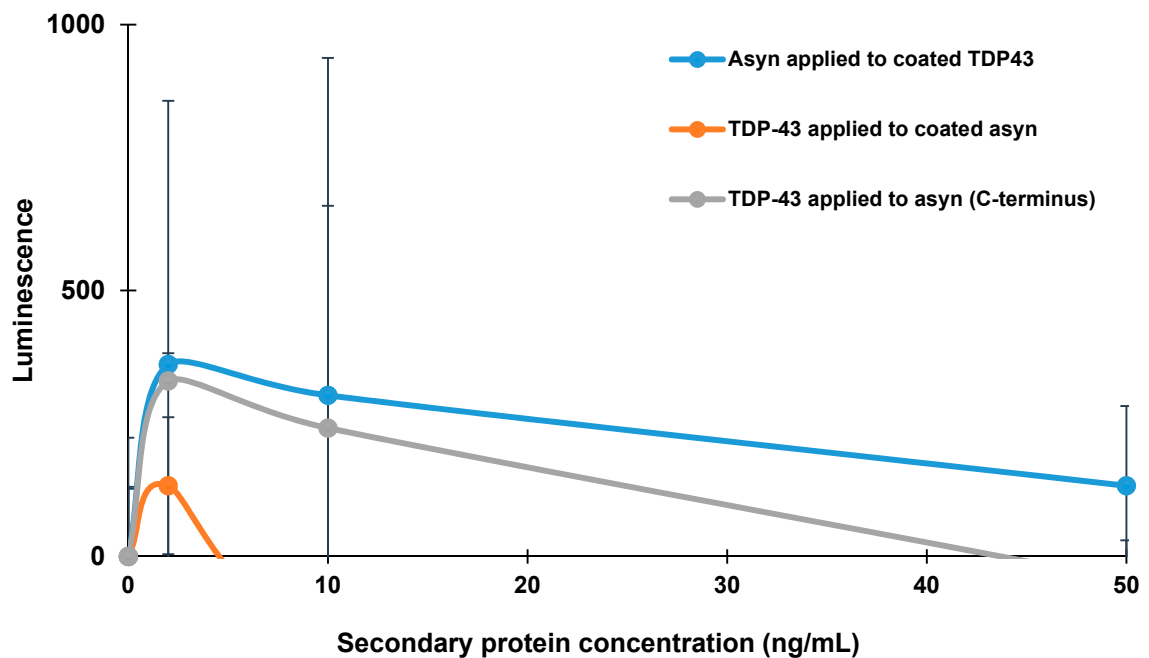

**Figure S2.** Conventional ELISA of serially diluted secondary protein bound to fixed concentrations of primary protein. Legends indicate the order in which the proteins were applied.
